# Supplementary material for: Identification of Oxygenated Fatty Acid as a Side Chain of Lipo-Alkaloids in Aconitum carmichaelii by UHPLC-Q-TOF-MS and a Database
Source: PubMed Central journal article supplement (PMC6273321; doi:10.3390/molecules21040437), 2016-03-31
Supplement: molecules-21-00437-s001.pdf [file molecules-21-00437-s001.pdf]

# Supplementary Materials: Identification of Oxygenated Fatty Acid as a Side Chain of Lipo-Alkaloids in *Aconitum carmichaelii* by UHPLC-Q-TOF-MS and a Database

Ying Liang, Jian-Lin Wu, Elaine Lai-Han Leung, Hua Zhou, Zhongqiu Liu, Guanyu Yan, Ying Liu, Liang Liu and Na Li

**Table S1.** <sup>1</sup>H-NMR and <sup>13</sup>C-NMR spectroscopic data for Compounds A1–A6 (δ in ppm and J in Hz).

| Position                          | A1                                                                                                                       |                      | A2                                                         |                      | A3                                                         |                      | A4                                                         |                      | A5                                                         |                      | A6                                                         |                      |
|-----------------------------------|--------------------------------------------------------------------------------------------------------------------------|----------------------|------------------------------------------------------------|----------------------|------------------------------------------------------------|----------------------|------------------------------------------------------------|----------------------|------------------------------------------------------------|----------------------|------------------------------------------------------------|----------------------|
|                                   | δ <sub>H</sub> (ppm)                                                                                                     | δ <sub>C</sub> (ppm) | δ <sub>H</sub> (ppm)                                       | δ <sub>C</sub> (ppm) | δ <sub>H</sub> (ppm)                                       | δ <sub>C</sub> (ppm) | δ <sub>H</sub> (ppm)                                       | δ <sub>C</sub> (ppm) | δ <sub>H</sub> (ppm)                                       | δ <sub>C</sub> (ppm) | δ <sub>H</sub> (ppm)                                       | δ <sub>C</sub> (ppm) |
| 1                                 | 3.141 (1H, dd, J <sub>1</sub> = 8.4, J <sub>2</sub> = 6)                                                                 | 83.47                | 3.163 (1H, m)                                              |                      | 3.148 (1H, t, J = 9.0)                                     |                      | 3.154 (1H, m)                                              |                      | 3.173 (1H, m)                                              |                      | 3.156 (1H, m)                                              |                      |
| 2                                 | 2.151 (1H, m),<br>2.327 (1H, J = 9.6)                                                                                    | 34.18                | 1.460 (1H, m),<br>1.810 (1H, m)                            |                      | 2.155 (1H, m),<br>2.332 (1H, d, J = 11.4)                  |                      | 2.161 (1H, m),<br>2.337 (1H, m)                            |                      | 2.386 (1H, m)                                              |                      | 2.382 (1H, m)                                              |                      |
| 3                                 | 3.790 (1H, m)                                                                                                            | 71.37                | 3.824 (1H, m)                                              |                      | 3.795 (1H, m)                                              |                      | 3.788 (1H, m)                                              |                      | 3.824 (1H, m)                                              |                      | 3.807 (1H, dd, J <sub>1</sub> = 9.0, J <sub>2</sub> = 4.8) |                      |
| 4                                 | -                                                                                                                        | 43.64                | -                                                          |                      | -                                                          |                      | -                                                          |                      | -                                                          |                      | -                                                          |                      |
| 5                                 | 2.094 (1H, d, J = 6.6)                                                                                                   | 46.52                | 2.157 (1H, br s)                                           |                      | 2.103 (1H, d, J = 6.6)                                     |                      | 2.099 (1H, d, J = 6)                                       |                      | 2.161 (1H, br s)                                           |                      | 2.152 (1H, br s)                                           |                      |
| 6                                 | 4.049 (1H, d, J = 6.6)                                                                                                   | 82.62                | 4.051 (1H, d, J = 6.6)                                     |                      | 4.050 (1H, d, J = 6.6)                                     |                      | 4.051 (2H, d, J = 6.6)                                     |                      | 4.055 (1H, d, J = 6.6)                                     |                      | 4.049 (1H, d, J = 6.0)                                     |                      |
| 7                                 | 2.903 (1H, s)                                                                                                            | 44.54                | 2.862 (1H, s)                                              |                      | 2.906 (1H, s)                                              |                      | 2.907 (1H, s)                                              |                      | 2.865 (1H, s)                                              |                      | 2.869 (1H, s)                                              |                      |
| 8                                 | -                                                                                                                        | 91.71                | -                                                          |                      | -                                                          |                      | -                                                          |                      | -                                                          |                      | -                                                          |                      |
| 9                                 | 2.936 (1H, t, J = 5.4)                                                                                                   | 43.93                | 2.929 (1H, t, J = 5.4)                                     |                      | 2.936 (1H, t, J = 5.4)                                     |                      | 2.939 (1H, t, J = 5.4)                                     |                      | 2.931 (1H, t, J = 6.0)                                     |                      | 2.934 (1H, t, J = 5.4)                                     |                      |
| 10                                | 2.138 (1H, m)                                                                                                            | 41.11                | 2.168 (1H, m)                                              |                      | 2.144 (1H, d, J = 3.0)                                     |                      | 2.146 (1H, d, J = 4.2)                                     |                      | 2.173 (1H, m)                                              |                      | 2.168 (1H, m)                                              |                      |
| 11                                | -                                                                                                                        | 50.25                | -                                                          |                      | -                                                          |                      | -                                                          |                      | -                                                          |                      | -                                                          |                      |
| 12                                | 2.325 (1H, m), 2.828 (1H, m)                                                                                             | 34.93                | /                                                          |                      | /                                                          |                      | /                                                          |                      | /                                                          |                      | /                                                          |                      |
| 13                                | -                                                                                                                        | 74.22                | -                                                          |                      | -                                                          |                      | -                                                          |                      | -                                                          |                      | -                                                          |                      |
| 14                                | 4.876 (1H, d, J = 4.8)                                                                                                   | 79.14                | 4.882 (1H, d, J = 5.4)                                     |                      | 4.885 (1H, d, J = 4.8)                                     |                      | 4.878 (1H, d, J = 5.4)                                     |                      | 4.885 (1H, d, J = 4.8)                                     |                      | 4.882 (1H, d, J = 4.9)                                     |                      |
| 15                                | 4.452 (1H, dd, J <sub>1</sub> = 5.4, J <sub>2</sub> = 3.0)                                                               | 79.09                | 4.461 (1H, dd, J <sub>1</sub> = 5.4, J <sub>2</sub> = 2.4) |                      | 4.455 (1H, dd, J <sub>1</sub> = 5.4, J <sub>2</sub> = 2.4) |                      | 4.454 (1H, dd, J <sub>1</sub> = 5.4, J <sub>2</sub> = 2.4) |                      | 4.464 (1H, dd, J <sub>1</sub> = 5.4, J <sub>2</sub> = 2.4) |                      | 4.461 (1H, dd, J <sub>1</sub> = 5.4, J <sub>2</sub> = 3.0) |                      |
| 15-OH                             | 4.475 (1H, d, J = 2.4)                                                                                                   |                      | 4.517 (1H, d, J = 2.6)                                     |                      | 4.522 (1H, d, J = 2.4)                                     |                      | 4.475 (1H, d, J = 2.4)                                     |                      | 4.522 (1H, d, J = 2.0)                                     |                      | 4.518 (1H, d, J = 2.6)                                     |                      |
| 16                                | 3.352 (1H, d, J = 5.4)                                                                                                   | 90.27                | 3.364 (1H, d, J = 5.4)                                     |                      | 3.354 (1H, d, J = 4.8)                                     |                      | 3.353 (1H, d, J = 5.4)                                     |                      | 3.365 (1H, d, J = 5.4)                                     |                      | 3.372 (1H, d, J = 4.8)                                     |                      |
| 17                                | 3.056 (1H, s)                                                                                                            | 62.38                | 3.117 (1H, s)                                              |                      | 3.061 (1H, s)                                              |                      | 3.063 (1H, s)                                              |                      | 3.109 (1H, s)                                              |                      | 3.116 (1H, s)                                              |                      |
| 18                                | 3.553 (1H, d, J = 9.0)                                                                                                   | 76.45                | 3.481 (1H, d, J = 9.0)                                     |                      | 3.552 (1H, d, J = 9.0)                                     |                      | 3.554 (1H, d, J = 9.0)                                     |                      | 3.485 (1H, d, J = 9.0)                                     |                      | 3.484 (1H, d, J = 8.9)                                     |                      |
| 19                                | 3.641 (1H, d, J = 9.0)                                                                                                   |                      | 3.621 (1H, d, J = 9.0)                                     |                      | 3.643 (1H, d, J = 9.0)                                     |                      | 3.644 (1H, d, J = 9.0)                                     |                      | 3.623 (1H, d, J = 9.0)                                     |                      | 3.623 (1H, d, J = 8.9)                                     |                      |
|                                   | 3.142 (1H, dd, J <sub>1</sub> = 8.4, J <sub>2</sub> = 6),<br>3.786 (1H, dd, J <sub>1</sub> = 12.0, J <sub>2</sub> = 7.2) | 49.52                | -                                                          |                      | -                                                          |                      | -                                                          |                      | -                                                          |                      | -                                                          |                      |
| N-CH <sub>3</sub>                 | 2.334 (3H, s)                                                                                                            | 42.57                | -                                                          |                      | 2.379 (3H, s)                                              |                      | 2.374 (3H, s)                                              |                      | -                                                          |                      | -                                                          |                      |
| N-CH <sub>2</sub> CH <sub>3</sub> | -                                                                                                                        | -                    | 1.125 (3H, t, J = 7.2)                                     |                      | -                                                          |                      | -                                                          |                      | 1.131 (3H, t, J = 6.6)                                     |                      | 1.116 (3H, t, J = 7.2)                                     |                      |
| 1-Ome                             | 3.356 (3H, s)                                                                                                            | 56.46                | 3.320 (3H, s)                                              |                      | 3.319 (3H, s)                                              |                      | 3.321 (3H, s)                                              |                      | 3.340 (3H, s)                                              |                      | 3.321 (3H, s)                                              |                      |
| 6-Ome                             | 3.172 (3H, s)                                                                                                            | 58.28                | 3.177 (3H, s)                                              |                      | 3.175 (3H, s)                                              |                      | 3.175 (3H, s)                                              |                      | 3.181 (3H, s)                                              |                      | 3.177 (3H, s)                                              |                      |
| 16-Ome                            | 3.782 (3H, s)                                                                                                            | 61.33                | 3.785 (3H, s)                                              |                      | 3.771 (3H, s)                                              |                      | 3.773 (3H, s)                                              |                      | 3.787 (3H, s)                                              |                      | 3.796 (3H, s)                                              |                      |
| 18-Ome                            | 3.306 (3H, s)                                                                                                            | 59.25                | 3.287 (3H, s)                                              |                      | 3.309 (3H, s)                                              |                      | 3.310 (3H, s)                                              |                      | 3.291 (3H, s)                                              |                      | 3.285 (3H, s)                                              |                      |
| 14-O-C=O                          | -                                                                                                                        | 166.18               | -                                                          |                      | -                                                          |                      | -                                                          |                      | -                                                          |                      | -                                                          |                      |

Table S1. Cont.

| Position | A1                        |                           | A2                        |                           | A3                        |                           | A4                        |                           | A5                        |                           | A6                        |                           |
|----------|---------------------------|---------------------------|---------------------------|---------------------------|---------------------------|---------------------------|---------------------------|---------------------------|---------------------------|---------------------------|---------------------------|---------------------------|
|          | $\delta_{\text{H}}$ (ppm) | $\delta_{\text{C}}$ (ppm) | $\delta_{\text{H}}$ (ppm) | $\delta_{\text{C}}$ (ppm) | $\delta_{\text{H}}$ (ppm) | $\delta_{\text{C}}$ (ppm) | $\delta_{\text{H}}$ (ppm) | $\delta_{\text{C}}$ (ppm) | $\delta_{\text{H}}$ (ppm) | $\delta_{\text{C}}$ (ppm) | $\delta_{\text{H}}$ (ppm) | $\delta_{\text{C}}$ (ppm) |
| 1'       | -                         | 129.87                    | -                         | -                         | -                         | -                         | -                         | -                         | -                         | -                         | -                         | -                         |
| 2',6'    | 8.049 (2H, d, $J = 7.2$ ) | 129.87                    | 8.047 (2H, t, $J = 7.4$ ) | -                         | 8.048 (2H, d, $J = 7.6$ ) | -                         | 8.052 (2H, d, $J = 7.2$ ) | -                         | 8.051 (1H, d, $J = 7.2$ ) | -                         | 8.051 (2H, d, $J = 7.2$ ) | -                         |
| 3',5'    | 7.471 (2H, t, $J = 7.8$ ) | 128.78                    | 7.471 (2H, t, $J = 7.4$ ) | -                         | 7.472 (2H, t, $J = 7.6$ ) | -                         | 7.473 (2H, t, $J = 7.6$ ) | -                         | 7.475 (1H, t, $J = 7.2$ ) | -                         | 7.472 (2H, t, $J = 7.6$ ) | -                         |
| 4'       | 7.589 (1H, t, $J = 7.4$ ) | 133.41                    | 7.590 (1H, t, $J = 7.4$ ) | -                         | 7.591 (1H, t, $J = 7.2$ ) | -                         | 7.592 (1H, t, $J = 7.2$ ) | -                         | 7.593 (1H, t, $J = 7.2$ ) | -                         | 7.591 (1H, t, $J = 7.2$ ) | -                         |
| (8-)-1"  | -                         | 175.3                     | -                         | -                         | -                         | -                         | -                         | -                         | -                         | -                         | -                         | -                         |
| 2"       | 1.450 (1H, m),            | 34.92                     | 1.473 (1H, m),            | -                         | 1.456 (1H, m),            | -                         | 1.451 (1H, m),            | -                         | 1.483 (1H, m),            | -                         | 1.487 (1H, m),            | -                         |
|          | 1.816 (1H, m)             |                           | 1.817 (1H, m)             |                           | 1.819 (1H, m)             |                           | 1.818 (1H, m)             |                           | 1.820 (1H, m)             |                           | 1.817 (1H, m)             |                           |
| 3"       | 1.025 (1H, m),            | 24.29                     | 1.025 (1H, m),            | -                         | 1.015 (1H, m),            | -                         | 1.020 (1H, m), 1.173      | -                         | 1.012 (1H, m),            | -                         | 1.010 (1H, m),            | -                         |
|          | 1.179 (1H, m)             |                           | 1.174 (1H, m)             |                           | 1.152 (1H, m)             |                           | (1H, m)                   |                           | 1.204 (1H, m)             |                           | 1.172 (1H, m)             |                           |
| 4"       | 0.885 (2H, m)             | 29.16                     | 0.887 (2H, m)             | -                         | 0.873 (2H, m)             | -                         | 0.884 (2H, m)             | -                         | 0.888 (2H, m)             | -                         | 0.814 (2H, m)             | -                         |
| 5"       | 1.026 (2H, m)             | 29.12                     | 1.025 (2H, m)             | -                         | 1.011 (2H, m)             | -                         | 1.023 (2H, m)             | -                         | 1.012 (2H, m)             | -                         | 1.012 (2H, m)             | -                         |
| 6"       | 1.177 (2H, m)             | 29.48                     | 1.174 (2H, m)             | -                         | 1.144 (2H, m)             | -                         | 1.176 (2H, m)             | -                         | 1.204 (2H, m)             | -                         | 1.173 (2H, m)             | -                         |
| 7"       | 1.380 (2H, m)             | 29.73                     | 1.324 (2H, m)             | -                         | 1.229 (2H, m)             | -                         | 1.312 (2H, m)             | -                         | 1.311 (2H, m)             | -                         | 1.306 (2H, m)             | -                         |
| 8"       | 2.045 (2H, m)             | 27.31                     | 2.058 (2H, m)             | -                         | 1.229 (2H, m)             | -                         | 2.042 (2H, m)             | -                         | 1.311 (2H, m)             | -                         | 2.034 (2H, m)             | -                         |
| 9"       | 5.376 (1H, m)             | 130.23                    | 5.380 (1H, m)             | -                         | 1.229 (2H, m)             | -                         | 5.374 (1H, m)             | -                         | 1.311 (2H, m)             | -                         | 5.384 (1H, m)             | -                         |
| 10"      | 5.376 (1H, m)             | 128.29                    | 5.380 (1H, m)             | -                         | 1.229 (2H, m)             | -                         | 5.374 (1H, m)             | -                         | 1.311 (2H, m)             | -                         | 5.384 (1H, m)             | -                         |
| 11"      | 2.802 (2H, m)             | 25.80                     | 2.797 (2H, t, $J = 6.0$ ) | -                         | 1.229 (2H, m)             | -                         | 2.042 (2H, m)             | -                         | 1.311 (2H, m)             | -                         | 2.034 (2H, m)             | -                         |
| 12"      | 5.376 (1H, m)             | 128.03                    | 5.380 (1H, m)             | -                         | 1.229 (2H, m)             | -                         | 1.312 (2H, m)             | -                         | 1.311 (2H, m)             | -                         | 1.306 (2H, m)             | -                         |
| 13"      | 5.376 (1H, m)             | 130.44                    | 5.380 (1H, m)             | -                         | 1.229 (2H, m)             | -                         | 1.312 (2H, m)             | -                         | 1.311 (2H, m)             | -                         | 1.306 (2H, m)             | -                         |
| 14"      | 2.045 (2H, m)             | 27.37                     | 2.058 (2H, m)             | -                         | 1.329 (2H, m)             | -                         | 1.312 (2H, m)             | -                         | 1.311 (2H, m)             | -                         | 1.306 (2H, m)             | -                         |
| 15"      | 1.380 (2H, m)             | 29.00                     | 1.324 (2H, m)             | -                         | 1.229 (2H, m)             | -                         | 1.312 (2H, m)             | -                         | 1.311 (2H, m)             | -                         | 1.306 (2H, m)             | -                         |
| 16"      | 1.380 (2H, m)             | 31.68                     | 1.324 (2H, m)             | -                         | 0.907 (3H, t, $J = 6.6$ ) | -                         | 1.312 (2H, m)             | -                         | 0.915 (3H, t, $J = 7.2$ ) | -                         | 1.306 (2H, m)             | -                         |
| 17"      | 1.308 (2H, m)             | 22.71                     | 1.324 (2H, m)             | -                         | -                         | -                         | 1.312 (2H, m)             | -                         | -                         | -                         | 1.306 (2H, m)             | -                         |
| 18"      | 0.907 (3H, t, $J = 6.6$ ) | 14.20                     | 0.908 (3H, t, $J = 7.2$ ) | -                         | -                         | -                         | 0.906 (3H, t, $J = 6.6$ ) | -                         | -                         | -                         | 0.910 (3H, t, $J = 7.2$ ) | -                         |

**Table S2.** Retention times, MS and MS/MS fragmentation ions for the identified lipo-alkaloids in *A. carmichaelii*.

| No. | Alkaloid            | Rt (min) | Calculated [M + H] <sup>+</sup> | Observed [M + H] <sup>+</sup> | MS/MS Fragmentation Ions                                                                                     |
|-----|---------------------|----------|---------------------------------|-------------------------------|--------------------------------------------------------------------------------------------------------------|
| 1   | 8-dhbtn-BMA *       | 3.4      | 692.3277                        | 692.3285                      | 572.2842, 540.2570, 522.2476, 512.2633, 508.2308, 490.2205, 354.1695, 105.0340                               |
| 2   | 8-act-10-OH-BMA *   | 3.4      | 762.2968                        | 762.2968                      | 588.2792, 556.2521, 538.2408, 528.2580, 524.2264, 506.2159, 496.2305, 492.1995, 370.1640, 105.0342           |
| 3   | 8-gvl-BMA *         | 3.6      | 902.3805                        | 902.3777                      | 572.2847, 540.2575, 522.2483, 512.2639, 508.2298, 490.2220, 480.2344, 354.1707, 105.0338                     |
| 4   | 8-act-BMA *         | 3.8      | 746.3018                        | 746.3002                      | 572.2842, 540.2582, 522.2462, 512.2626, 508.2344, 490.2192, 480.2367, 476.2047, 354.1695, 105.0335           |
| 5   | 8-hbbtn-10-OH-BMA * | 4.0      | 692.3277                        | 692.3258                      | 588.2798, 556.2524, 538.2397, 528.2573, 524.2261, 506.2156, 496.2288, 370.1646, 105.0329                     |
| 6   | 8-gcf-BMA *         | 4.2      | 914.3805                        | 914.3784                      | 752.3262, 572.2838, 540.2586, 522.2462, 512.2634, 508.2324, 490.2216, 476.2046, 354.1702, 105.0335           |
| 7   | 8-gfr-BMA *         | 4.5      | 928.3961                        | 928.3946                      | 766.3412, 572.2842, 540.2574, 522.2469, 512.2642, 508.2329, 490.2207, 480.2325, 476.2111, 354.1687, 105.0336 |
| 8   | 8-act-BHA *         | 4.6      | 730.3069                        | 730.3041                      | 556.2928, 524.2662, 496.2698, 492.2375, 464.2452, 460.2083, 338.1737, 105.0331                               |
| 9   | 8-adp-10-OH-BMA *   | 4.7      | 734.3382                        | 734.3324                      | 588.2802, 556.2539, 538.2799, 528.2597, 524.2285, 506.2531, 496.2327, 492.2020, 370.1651, 105.0336           |
| 10  | 8-hadp-BMA *        | 4.7      | 734.3382                        | 734.3324                      | 572.2848, 540.2605, 522.2419, 512.2612, 508.2277, 354.1695, 105.0345                                         |
| 11  | 8-hbbtn-BMA *       | 4.8      | 676.3328                        | 676.3321                      | 572.2845, 540.2590, 522.2472, 512.2631, 508.2319, 490.2212, 480.2368, 354.1699, 105.0335                     |
| 12  | 8-act-BA *          | 5.0      | 760.3175                        | 760.3189                      | 586.3000, 554.2730, 536.2644, 526.2794, 522.2483, 504.2426, 494.2519, 490.2192, 368.1853, 105.0337           |
| 13  | 8-dohpnd-BMA *      | 5.3      | 760.3175                        | 760.3176                      | 572.2837, 540.2591, 522.2483, 512.2639, 508.2324, 490.2192, 480.2364, 476.217, 354.1699, 105.0337            |
| 14  | 8-fmr-BHA *         | 5.6      | 672.3015                        | 672.3024                      | 556.2890, 524.2636, 496.2685, 492.2386, 464.2441, 460.2147, 338.1754, 105.0335                               |
| 15  | 8-hbbtn-BHA *       | 5.8      | 660.3384                        | 660.3380                      | 556.296, 524.2632, 496.2673, 492.2372, 464.2429, 460.2101, 338.1748, 105.0341                                |
| 16  | 8-act-DBA *         | 5.8      | 744.3226                        | 744.3244                      | 570.3048, 538.2789, 510.2838, 506.2522, 478.2573, 352.1903, 105.0336                                         |
| 17  | 8-gfr-BA *          | 5.9      | 942.4118                        | 942.4084                      | 780.3579, 586.2997, 554.2729, 536.2591, 526.2775, 522.2464, 504.2341, 494.2538, 368.1844, 105.0335           |
| 19  | 8-scnd-BHA *        | 6.3      | 674.3173                        | 674.3172                      | 556.2894, 524.2633, 496.2681, 492.2369, 464.2421, 460.2110, 338.1745, 105.0342                               |
| 21  | 8-adp-BHA *         | 6.7      | 702.3484                        | 702.3473                      | 556.2885, 524.2621, 496.2662, 492.2359, 464.2415, 460.2072, 338.1744, 105.0339                               |
| 22  | 8-hbte-DBA *        | 6.8      | 674.3535                        | 674.3499                      | 570.3052, 538.2791, 522.2800, 510.2842, 508.2592, 352.1911, 105.0341                                         |
| 23  | 8-fmr-DBA *         | 6.9      | 686.3171                        | 686.3170                      | 570.3050, 538.2779, 512.2855, 508.2626, 352.1906, 105.0334                                                   |
| 24  | 8-hvtr-DBA *        | 7.2      | 688.3691                        | 688.3682                      | 570.3057, 538.2797, 522.2470, 512.2624, 508.2319, 490.2226, 352.1905, 105.0335                               |
| 25  | 8-gtn-BHA *         | 7.6      | 686.3171                        | 686.3173                      | 556.2896, 524.2625, 496.2762, 492.2368, 464.2416, 460.2141, 338.1745, 105.0336                               |
| 26  | 8-adp-DBA *         | 7.7      | 716.3641                        | 716.3633                      | 570.3047, 538.2812, 522.2548, 512.2552, 508.2592, 354.1648, 105.0342                                         |
| 28  | 8-bte-BMA *         | 8.7      | 658.3222                        | 658.3244                      | 572.2848, 540.2599, 522.2465, 512.2658, 508.2337, 490.2222, 480.2378, 354.1695, 105.0338                     |
| 29  | 8-azl-BMA *         | 9.8      | 760.3903                        | 760.3903                      | 572.2833, 540.2566, 522.2426, 512.2661, 508.2354, 354.1685, 105.0339                                         |
| 30  | 8-sbc-BMA *         | 10.3     | 744.4059                        | 774.4051                      | 572.2850, 540.2585, 522.2487, 512.2639, 508.2336, 490.2213, 480.2391, 476.2074, 354.1691, 105.0332           |
| 31  | 8-btn-BHA *         | 10.8     | 644.3429                        | 644.3423                      | 556.2900, 524.2634, 496.2678, 492.2367, 464.2414, 460.2104, 338.1748, 105.0339                               |
| 32  | 8-btr-BA *          | 10.8     | 674.3535                        | 674.3529                      | 586.3011, 554.2742, 536.2633, 526.2794, 522.2848, 512.2645, 508.2336, 490.2217, 368.1853, 105.0338           |
| 33  | 8-vlr-BMA *         | 10.8     | 674.3535                        | 674.3529                      | 572.2845, 540.2579, 522.2848, 512.2645, 508.2336, 490.22117, 480.2374, 354.1697, 105.0338                    |
| 34  | 8-hnne-BMA *        | 10.9     | 744.3954                        | 744.3960                      | 572.2841, 540.2590, 522.2478, 512.2631, 490.2193, 480.2344, 354.1687, 105.0343                               |
| 35  | 8-thode-BMA *       | 11.4     | 902.5266                        | 902.5268                      | 572.2844, 540.2580, 522.2470, 512.2626, 508.2316, 490.2202, 480.2352, 354.1688, 105.0335                     |
| 36  | 8-azl-DBA *         | 11.5     | 758.4110                        | 758.4119                      | 570.3059, 538.2772, 510.2757, 506.2489, 478.2550, 352.1893, 105.0335                                         |
| 37  | 8-hnne-BA *         | 11.6     | 758.4110                        | 758.4103                      | 586.3000, 554.2769, 536.2622, 526.2731, 522.2481, 494.2670, 490.2187, 368.1851, 105.0335                     |
| 39  | 8-btr-DBA           | 12.0     | 658.3586                        | 658.3558                      | 570.3050, 538.2789, 522.2867, 512.2920, 508.2709, 490.2562, 352.1905, 105.0334                               |

Table S2. Cont.

| No. | Alkaloid            | Rt (min) | Calculated [M + H] <sup>+</sup> | Observed [M + H] <sup>+</sup> | MS/MS Fragmentation Ions                                                                           |
|-----|---------------------|----------|---------------------------------|-------------------------------|----------------------------------------------------------------------------------------------------|
| 41  | 8-vlr-BHA *         | 12.0     | 658.3586                        | 658.3599                      | 556.2898, 524.2636, 496.2677, 492.2373, 464.2420, 460.2112, 338.1749, 105.0334                     |
| 42  | 8-thode-BA *        | 12.2     | 916.5417                        | 916.5399                      | 586.2996, 554.2718, 536.2638, 526.2778, 368.1835, 105.0335                                         |
| 43  | 8-thode-BHA *       | 12.3     | 886.5311                        | 886.5662                      | 556.2882, 524.2624, 496.2666, 492.2363, 464.2410, 460.2115, 338.1736, 105.0335                     |
| 44  | 8-hnne-BHA *        | 12.5     | 728.4004                        | 728.3993                      | 556.2896, 524.2635, 496.2667, 492.2362, 464.2414, 460.2092, 338.1752, 105.0336                     |
| 45  | 8-thode-DBA *       | 13.0     | 900.5468                        | 900.5474                      | 570.3066, 538.2801, 510.2856, 506.2533, 478.2591, 352.1910, 105.0336                               |
| 46  | 8-dhudn-BMA         | 13.2     | 790.4372                        | 790.4367                      | 572.2851, 540.2601, 522.2500, 512.2661, 508.2323, 354.1705, 105.0336                               |
| 47  | 8-vlr-DBA *         | 13.3     | 672.3742                        | 672.3752                      | 570.3055, 538.2791, 522.2834, 512.2871, 508.2557, 490.2582, 352.1903, 105.0332                     |
| 48  | 8-thnde-BMA *       | 13.3     | 916.5417                        | 916.5401                      | 572.2851, 540.2596, 522.2480, 512.2632, 508.2313, 490.2171, 480.2359, 354.1699, 105.0334           |
| 49  | 8-dded-BMA *        | 13.5     | 800.4216                        | 800.4234                      | 572.2828, 540.2594, 522.2456, 512.2590, 508.2293, 354.1679, 105.0339                               |
| 50  | 8-dhudn-BHA         | 13.6     | 774.4423                        | 774.4400                      | 556.2895, 524.2638, 496.2680, 492.2361, 464.2439, 338.1739, 105.0336                               |
| 51  | 8-pal-DMBHA *       | 13.6     | 782.5202                        | 782.5161                      | 526.2761, 494.2505, 462.2232, 434.2322, 340.1876, 105.0330                                         |
| 52  | 8-otn-BMA *         | 15.1     | 716.4004                        | 716.3982                      | 572.2849, 540.2582, 522.2449, 512.2623, 508.2323, 490.2213, 480.2370, 476.2048, 354.1691, 105.0336 |
| 53  | 8-dhodd-BMA *       | 15.2     | 884.5155                        | 884.5174                      | 572.2851, 540.2615, 522.2497, 512.2631, 508.2316, 490.2222, 480.2374, 354.1707, 105.0335           |
| 54  | 8-nnn-BMA *         | 15.9     | 730.4161                        | 730.4154                      | 572.2837, 540.2580, 522.2492, 512.2614, 508.2317, 490.2202, 480.2357, 476.2021, 354.1688, 105.0329 |
| 55  | 8-dhodd-BA *        | 16.2     | 898.5311                        | 898.5307                      | 586.3003, 554.2745, 536.2634, 526.2801, 522.2473, 504.2414, 494.2503, 368.1860, 105.0334           |
| 56  | 8-dhode-BMA *       | 16.3     | 886.5311                        | 886.5318                      | 572.2847, 540.2583, 522.2474, 512.2629, 508.2323, 490.2208, 480.2368, 354.1694, 105.0334           |
| 57  | 8-dhode-BA *        | 16.8     | 900.5468                        | 900.5438                      | 586.3003, 554.2741, 536.2634, 526.2789, 522.2481, 504.2376, 494.2521, 368.1859, 105.0335           |
| 58  | 8-hodt-BMA *        | 17.0     | 866.5049                        | 866.5054                      | 572.2847, 540.2578, 522.2469, 512.2628, 508.2329, 490.2214, 480.2367, 354.1693, 105.0335           |
| 59  | 8-dhodd-BHA *       | 17.1     | 868.5206                        | 868.5191                      | 556.2904, 524.2636, 496.2678, 492.2375, 464.2415, 460.2123, 338.1749, 105.0335                     |
| 60  | 8-dhstr-BMA *       | 17.3     | 888.5468                        | 888.5438                      | 572.2850, 540.2584, 522.2483, 512.2637, 508.2325, 490.2210, 480.2358, 354.1699, 105.0335           |
| 61  | 8-dhode-BHA *       | 17.4     | 870.5362                        | 870.5335                      | 556.2904, 524.2634, 496.2681, 492.2373, 464.2414, 460.2097, 338.1749, 105.0335                     |
| 62  | 8-hodd-10-OH-BMA *  | 18.1     | 884.5313                        | 884.5292                      | 588.2794, 556.2874, 538.2781, 528.2580, 524.2602, 506.2514, 370.1641, 105.0334                     |
| 63  | 8-dhode-DBA *       | 18.1     | 884.5519                        | 884.5486                      | 570.3050, 538.2781, 510.2830, 506.2514, 478.2579, 352.1905, 105.0336                               |
| 64  | 8-hodt-BA *         | 18.4     | 880.5206                        | 880.5199                      | 586.3009, 554.2742, 536.2633, 526.2796, 522.2457, 504.2389, 494.2531, 368.1858, 105.0336           |
| 65  | 8-hodt-BHA *        | 18.4     | 850.5100                        | 850.5096                      | 556.2904, 524.2638, 496.2686, 492.2372, 464.2414, 460.2108, 338.1747, 105.0335                     |
| 66  | 8-dhstr-BHA *       | 18.5     | 872.5519                        | 872.5518                      | 556.2903, 524.2642, 496.2694, 492.2375, 464.2429, 460.2103, 338.1751, 105.0335                     |
| 67  | 8-hodd-BMA *        | 18.8     | 868.5206                        | 868.5196                      | 572.2850, 540.2584, 522.2472, 512.2635, 508.2315, 490.2199, 480.2384, 354.1692, 105.0336           |
| 68  | 8-dhctc-BMA *       | 18.8     | 910.5311                        | 910.5304                      | 572.2849, 540.2595, 522.2465, 512.2636, 508.2310, 490.2198, 480.2382, 354.1699, 105.0338           |
| 69  | 8-hodd-BA *         | 19.4     | 882.5368                        | 882.5349                      | 586.3005, 554.2735, 536.2622, 526.2782, 522.2465, 504.2361, 494.2516, 368.1847, 105.0336           |
| 70  | 8-dhhctc-BA *       | 19.8     | 924.5548                        | 924.5455                      | 556.2896, 524.2627, 496.2682, 492.2367, 464.2418, 460.2135, 338.1746, 105.0342                     |
| 71  | 8-hodd-BHA *        | 20.1     | 852.5256                        | 852.5264                      | 556.2907, 524.2642, 496.2681, 492.2371, 464.2422, 460.2104, 338.1747, 105.0335                     |
| 72  | 8-hode-BMA *        | 20.1     | 870.5362                        | 870.5359                      | 572.2849, 540.2585, 522.2472, 512.2628, 508.2319, 490.2213, 480.2387, 354.1693, 105.0336           |
| 73  | 8-hodt-DBA *        | 21.0     | 864.5256                        | 864.5255                      | 570.3047, 538.2783, 510.2831, 506.2516, 478.2566, 352.1897, 105.0334                               |
| 74  | 8-hodd-DBA *        | 21.2     | 866.5413                        | 866.541                       | 570.3047, 538.2797, 510.2843, 506.2522, 478.2584, 352.1906, 105.0335                               |
| 75  | 8-hode-BA *         | 21.8     | 884.5524                        | 884.5494                      | 586.3002, 554.2727, 536.2628, 526.2781, 522.2470, 504.2360, 494.2516, 368.1843, 105.0336           |
| 79  | 8-hode-BHA *        | 22.7     | 854.5413                        | 854.5409                      | 556.2903, 524.2638, 496.2679, 492.2371, 464.2424, 460.2113, 338.1747, 105.0334                     |
| 85  | 8-linolen-3-DMDBA * | 23.3     | 818.5202                        | 818.5209                      | 540.2948, 508.2693, 480.2710, 476.2424, 448.2476, 354.3065, 105.0330                               |
| 88  | 8-hpdde-BMA *       | 23.8     | 838.5100                        | 838.5105                      | 572.2847, 540.2607, 522.2475, 512.2635, 508.2329, 490.2216, 480.2362, 354.1696, 105.0333           |
| 90  | 8-hode-DBA *        | 23.9     | 868.5569                        | 868.5559                      | 570.3029, 538.2776, 510.2792, 352.1858, 105.0336                                                   |
| 92  | 8-hpdde-BHA *       | 24.1     | 822.5151                        | 822.514                       | 556.2901, 524.2640, 496.2685, 492.2396, 464.2423, 460.2320, 338.1756, 105.0337                     |
| 95  | 8-lino-DMBHA *      | 24.3     | 806.5202                        | 806.519                       | 526.2758, 494.2499, 462.2244, 434.2319, 340.1882, 105.0332                                         |
| 97  | 8-lino-13-DMDBA *   | 24.4     | 820.5358                        | 820.5348                      | 540.2966, 508.2707, 490.2588, 480.2750, 476.2435, 458.2327, 448.2482, 105.0337                     |

Table S2. Cont.

| No. | Alkaloid              | Rt (min) | Calculated [M + H] <sup>+</sup> | Observed [M + H] <sup>+</sup> | MS/MS Fragmentation Ions                                                                 |
|-----|-----------------------|----------|---------------------------------|-------------------------------|------------------------------------------------------------------------------------------|
| 101 | 8-hstr-DMA *          | 24.7     | 854.5726                        | 854.5778                      | 570.3042, 538.2789, 510.2845, 506.2506, 478.2553, 352.1900, 105.0333                     |
| 103 | 8-lino-3-DMDBA *      | 24.9     | 820.5358                        | 820.5359                      | 540.2960, 508.2691, 480.2742, 476.2429, 448.2472, 354.2037, 105.0336                     |
| 104 | 8-linolen-3,13-DDBA * | 25.0     | 832.5358                        | 832.5355                      | 554.3107, 522.2846, 494.2897, 490.2581, 462.2634, 458.2313, 105.0333                     |
| 105 | 8-linolen-DMDDBA *    | 25.0     | 802.5252                        | 802.5237                      | 524.2956, 492.2715, 464.2774, 460.2465, 432.2537, 105.0337                               |
| 110 | 8-ole-DMBHA *         | 25.5     | 808.5358                        | 808.5306                      | 526.2795, 494.2547, 462.2274, 434.2291, 340.1912, 105.0336                               |
| 114 | 8-pme-DBA *           | 25.9     | 824.5307                        | 824.5305                      | 570.3062, 538.2799, 510.2842, 506.2534, 478.2581, 352.1909, 105.0335                     |
| 115 | 8-ole-13-DMDBA *      | 26.0     | 822.5515                        | 822.5527                      | 540.2964, 508.2698, 490.2586, 480.2745, 476.2435, 458.2323, 448.2480, 105.0336           |
| 116 | 8-pal-DMDBA *         | 26.0     | 796.5358                        | 796.5371                      | 540.2964, 508.2698, 490.2581, 480.2744, 476.2430, 458.2321, 448.2477, 105.0337           |
| 117 | 8-ole-3-DMDBA *       | 26.1     | 822.5515                        | 822.5511                      | 540.2965, 508.2700, 480.2479, 476.2441, 448.2477, 354.2071, 105.0336                     |
| 119 | 8-pal-13-DMDBA *      | 26.1     | 796.5358                        | 796.5368                      | 540.2915, 508.2653, 480.2704, 476.2398, 448.2432, 354.2041, 105.0329                     |
| 120 | 8-lino-DMDDBA *       | 26.2     | 804.5409                        | 804.5387                      | 524.3002, 492.2733, 464.2781, 460.2476, 432.2520, 105.0338                               |
| 131 | 8-ole-DMDDBA *        | 27.4     | 806.5565                        | 806.5512                      | 524.2962, 492.2705, 464.2767, 460.2437, 432.2524, 105.0333                               |
| 134 | 8-ole-3,13-DDBA *     | 27.7     | 836.5671                        | 836.5619                      | 554.3075, 522.2823, 494.2863, 490.2547, 462.2616, 458.2304, 105.0329                     |
| 136 | 8-tn-BMA *            | 28.2     | 926.6352                        | 926.6308                      | 572.2843, 540.2595, 522.2468, 512.2651, 508.2327, 490.2210, 476.2034, 354.1692, 105.0335 |
| 137 | 8-pal-DMDDBA *        | 28.3     | 780.5409                        | 780.5384                      | 524.3000, 492.2736, 464.2792, 460.2480, 432.2507, 105.0334                               |
| 140 | 8-dcn-BMA *           | 28.9     | 912.6195                        | 912.6194                      | 572.2860, 540.2623, 522.2484, 512.2608, 508.2330, 490.2237, 480.2362, 354.1732, 105.0336 |

\* Abbreviations: fmr (fumaric acid), bte (butenoic acid), hbte (hydroxybutenoic acid), scn (succinic acid), btn (butanoic acid), hbtn (hydroxybutanoic acid), dhbtn (dihydroxybutanoic acid), gtn (glutaconic acid), ogtr (oxoglutaric acid), gtr (glutaric acid), vlr (valeric acid), hvlr (hydroxyvaleric acid), act (aconitic acid), adp (adipic acid), hadp (hydroxyadipic acid), hxn (hexanoic acid), dohpnd (dioxoheptanedioic acid), otn (octanoic acid), hnn (hydroxynonenoic acid), azl (azelaic acid), nnn (nonanoic acid), sbc (sebacic acid), dhudn (dihydroxyundecanoic acid), dded (dodecenedioic acid), laur (lauric acid), myr (myristic acid), ptde (pentadecenoic acid), ptdn (pentadecanoic acid), pmde (palmitadienoic acid), pme (palmitoleic acid), pal (palmitic acid), hpdde (heptadecadienoic acid), hpde (heptadecenoic acid), hpdn (heptadecanoic acid), linolen (linolenic acid), hodt (hydroxyoctadecatrienoic acid), lino (linoleic acid), hodd (hydroxyoctadecadienoic acid), dhodd (dihydroxyoctadecadienoic acid), ole (oleic acid), hode (hydroxyoctadecenoic acid), dhode (dihydroxyoctadecenoic acid), thode (trihydroxyoctadecenoic acid), str (stearic acid), hstr (hydroxystearic acid), dhstr (dihydroxy stearic acid), thnde (trihydroxynonadecenoic acid), dhecte (dihydroxyeicosatrienoic acid), ecde (eicosadienoic acid), dhctte (dihydroxyhenicosatetrenoic acid), dcn (docosanoic acid), tcn (tricosanoic acid), ttcn (tetreicosanoic acid), gvl (glucovanillic acid), gcf (glucocaffaic acid), gfr (glucoferilic acid).

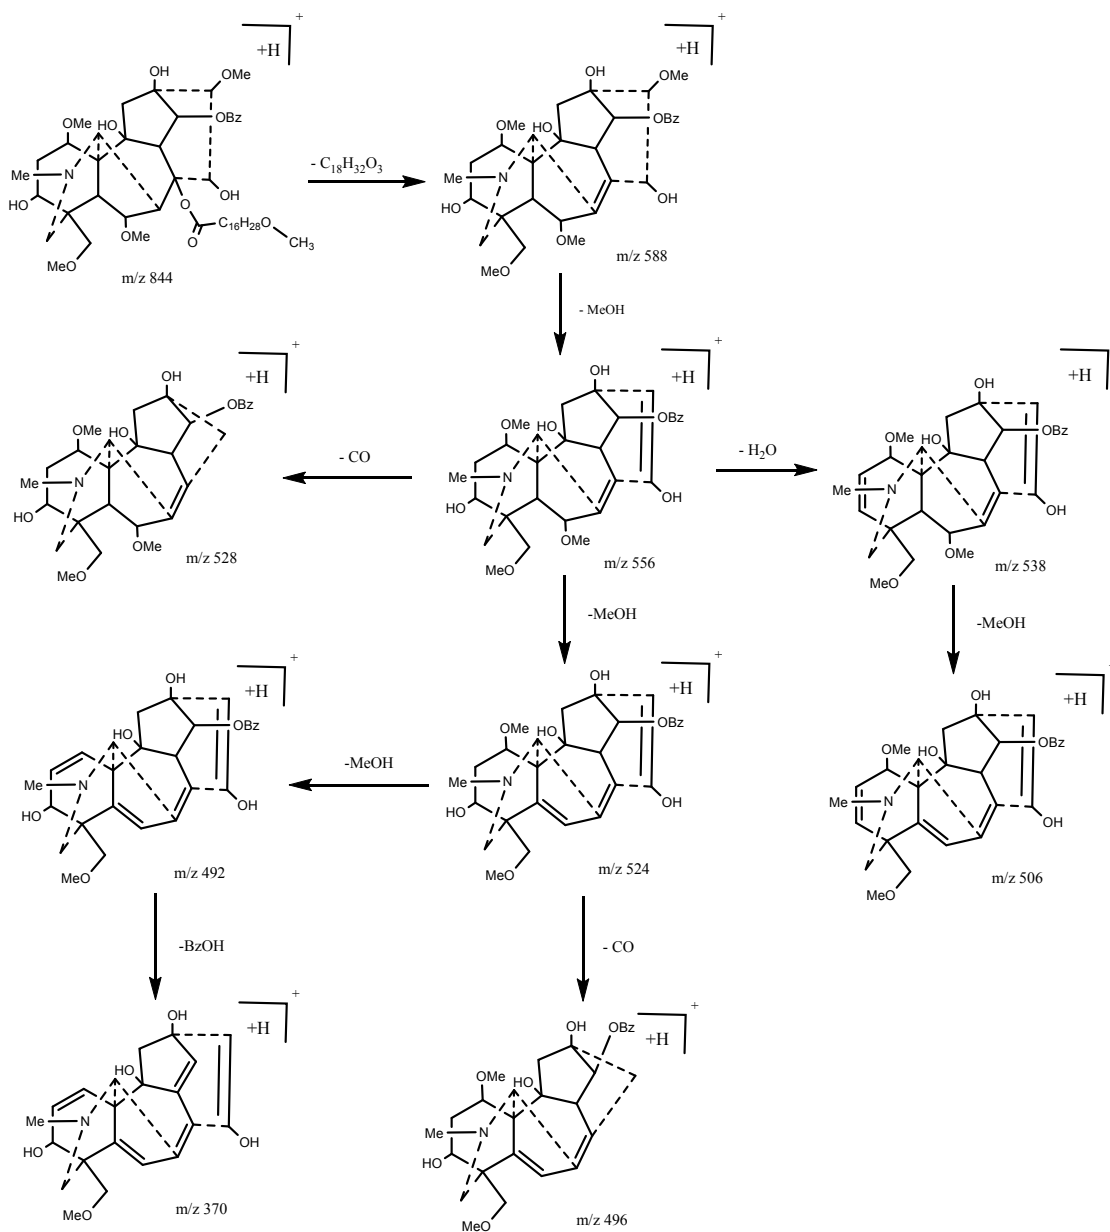

**Scheme S1.** Proposed fragmentation pathway of compound 62 in ESI-MS/MS.

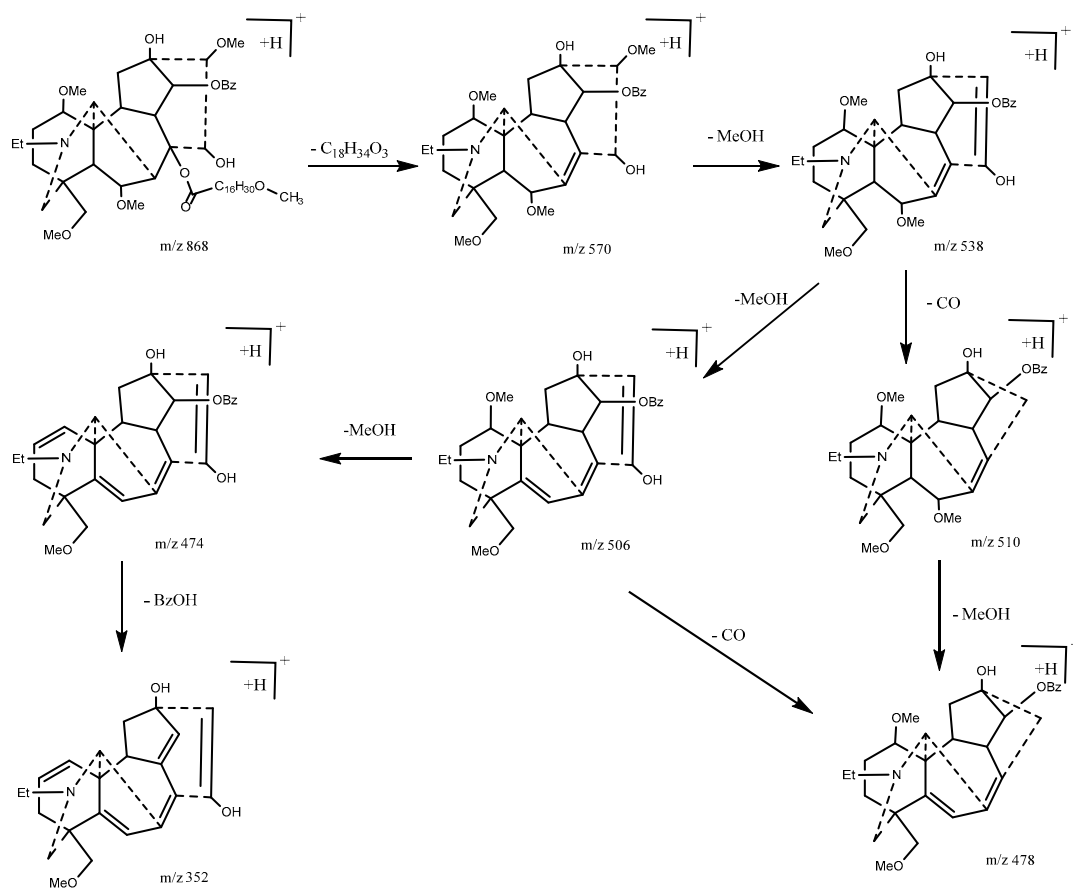

**Scheme S2.** Proposed fragmentation pathway of compound 90 in ESI-MS/MS.

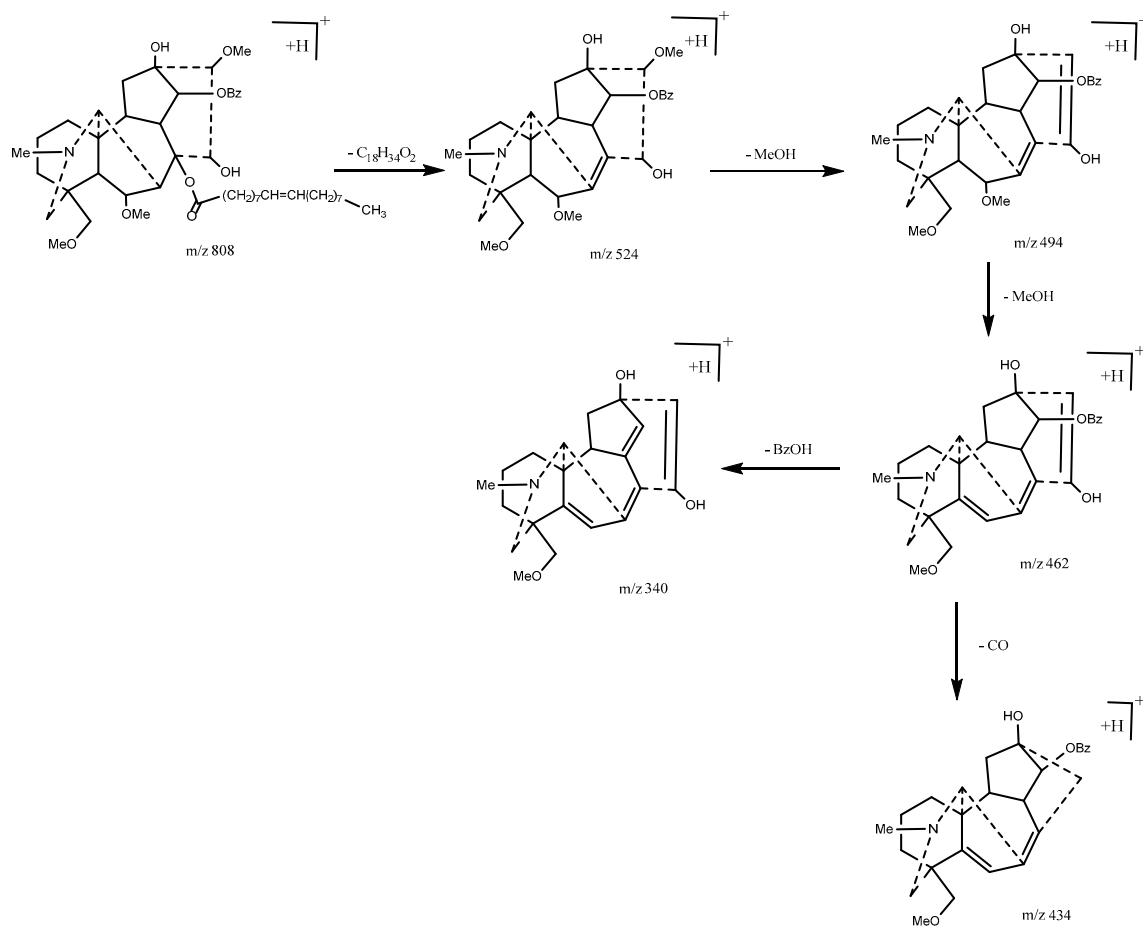

**Scheme S3.** Proposed fragmentation pathway of compound 110 in ESI-MS/MS.



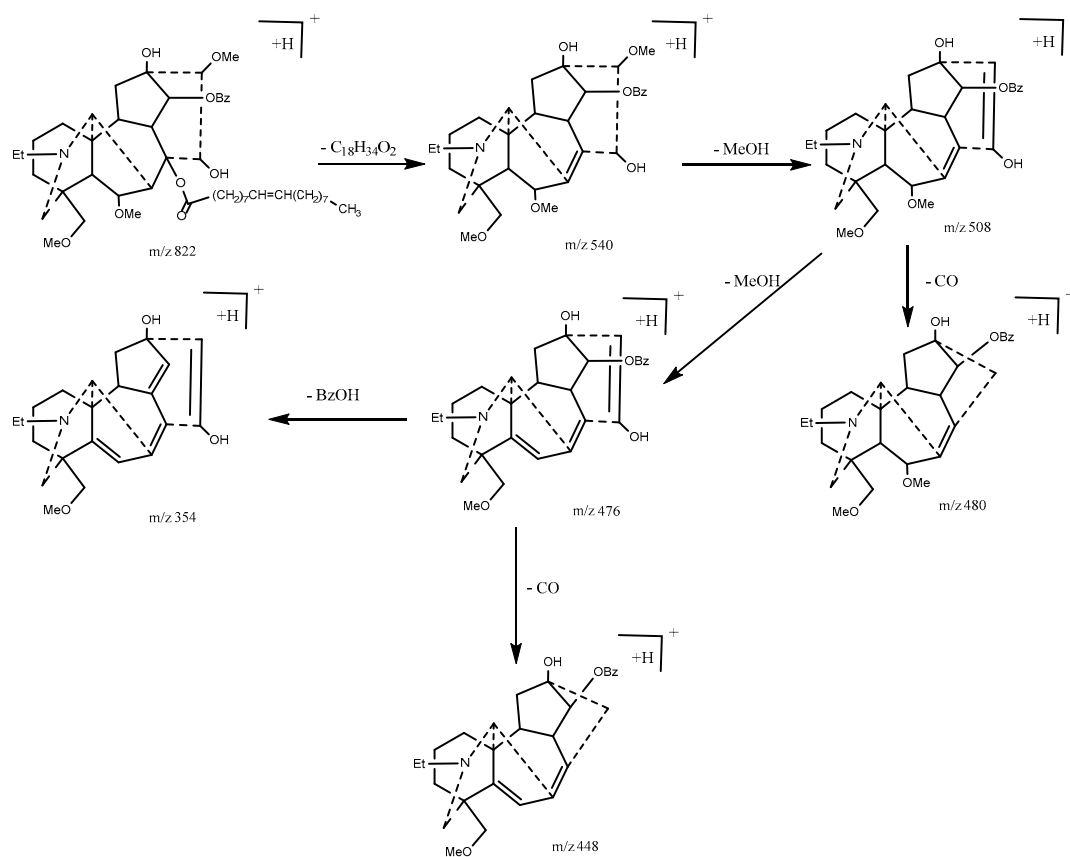

**Scheme S4.** Proposed fragmentation pathway of compound 117 in ESI-MS/MS.

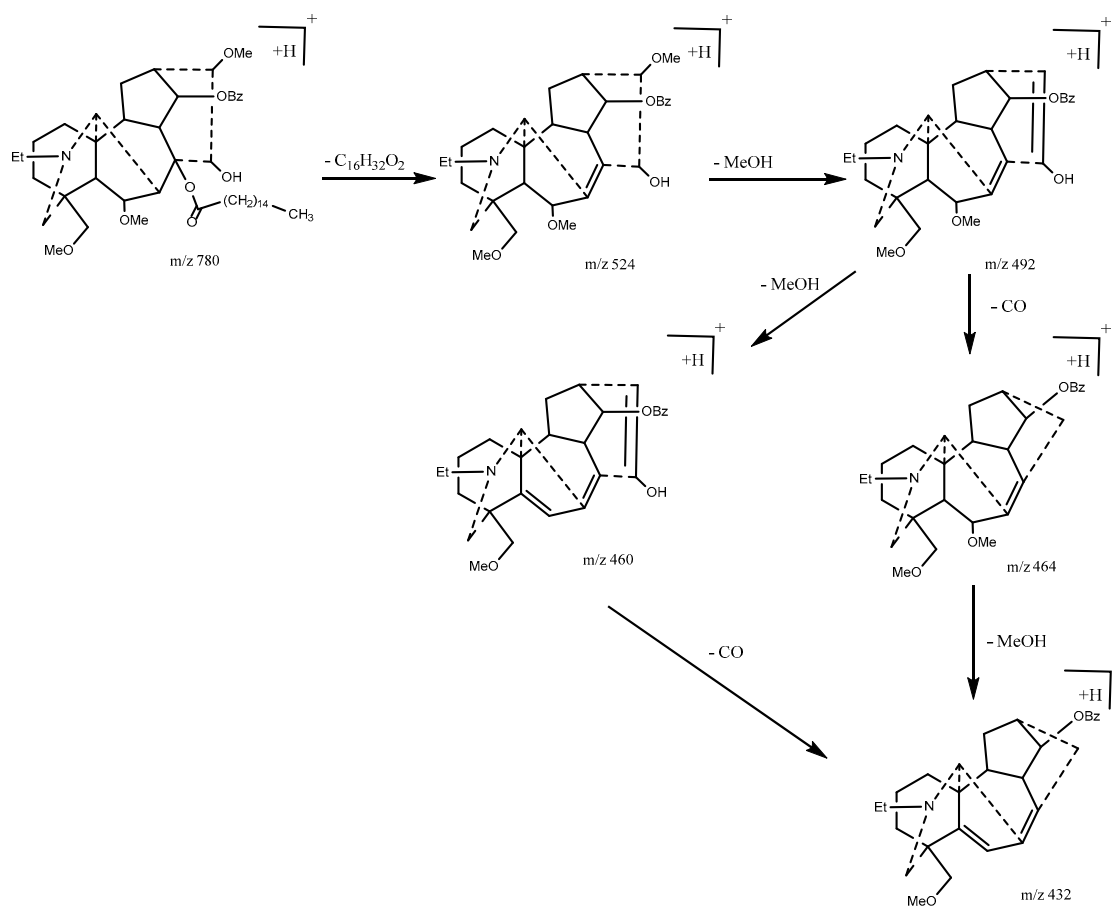

**Scheme S5.** Proposed fragmentation pathway of compound 137 in ESI-MS/MS.
